# Supplementary material for: The self-assembly of porous microspheres of tin dioxide octahedral nanoparticles for high performance lithium ion battery anode materials
Source: Royal Society of Chemistry journal article supplement (doi:10.1039/c0jm04139d), 2011-01-01
Supplement: c0jm04139d.pdf [file c0jm04139d.pdf]

# The Self-assembly Porous Microspheres of Tin Dioxide Octahedral Nanoparticles for High Performance Lithium Ion Batteries Anode Materials

Hua Wang,<sup>a</sup> Yongmin Wu,<sup>b</sup> Yusong Bai,<sup>a</sup> Wei Zhou,<sup>a</sup> Yiran An,<sup>a</sup> Jinghong Li,<sup>\*b</sup> and  
Lin Guo<sup>\*a</sup>

School of Chemistry and Environment, Beijing University of Aeronautics and  
Astronautics, Beijing 100191, People's Republic of China

Department of Chemistry, Lab. of Bioorganic Phosphorus Chemistry & Chemical  
Biology, Tsinghua University, Beijing 100084, People's Republic of China

E-mail: jhli@mail.tsinghua.edu.cn; guolin@buaa.edu.cn

Supporting information:

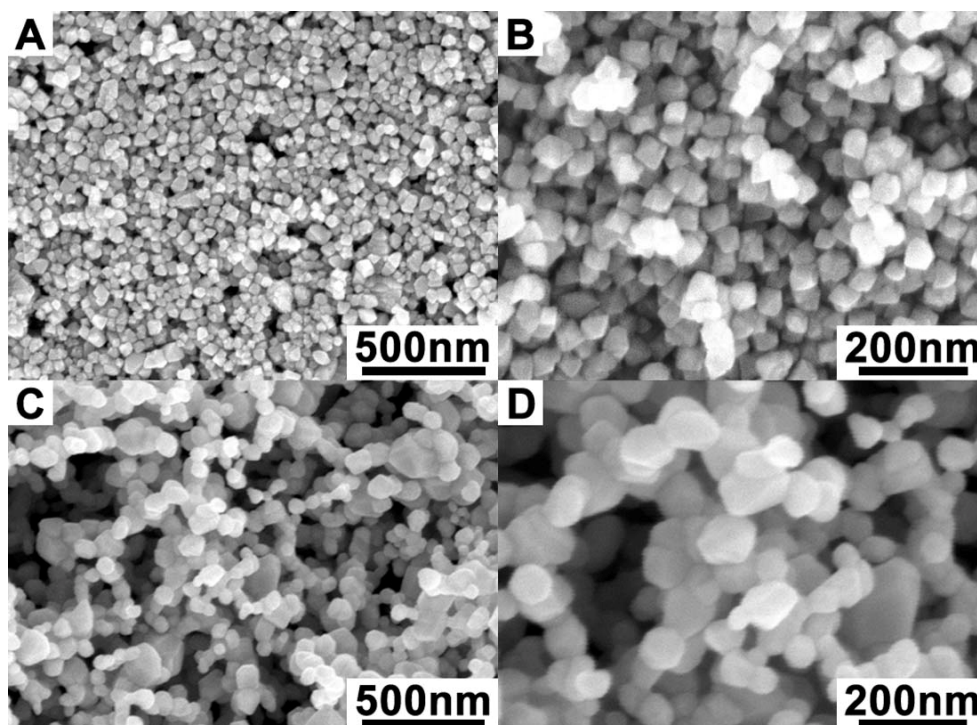

**Figure S1.** SEM images of SnO<sub>2</sub> octahedral nanoparticles (A, B) and irregular SnO<sub>2</sub> nanoparticles (C, D) at low and high magnification.

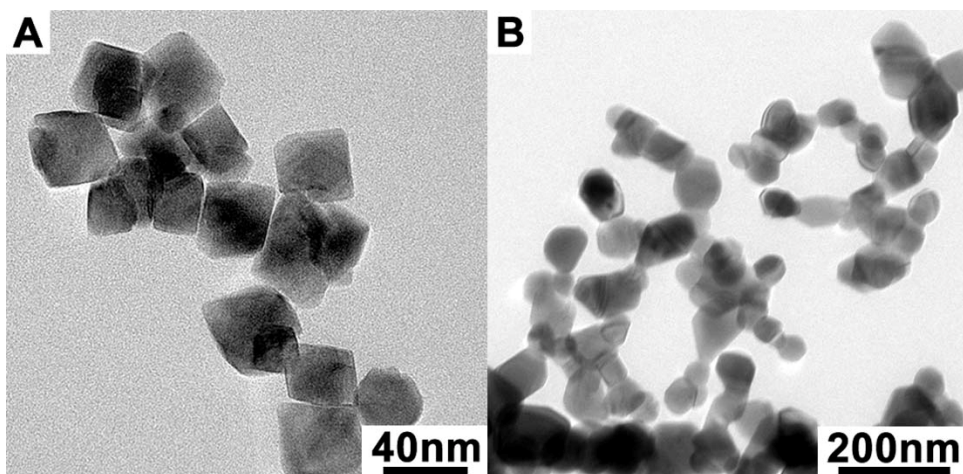

**Figure S2.** TEM images of SnO<sub>2</sub> octahedral nanoparticles (A) and irregular SnO<sub>2</sub> nanoparticles (B).

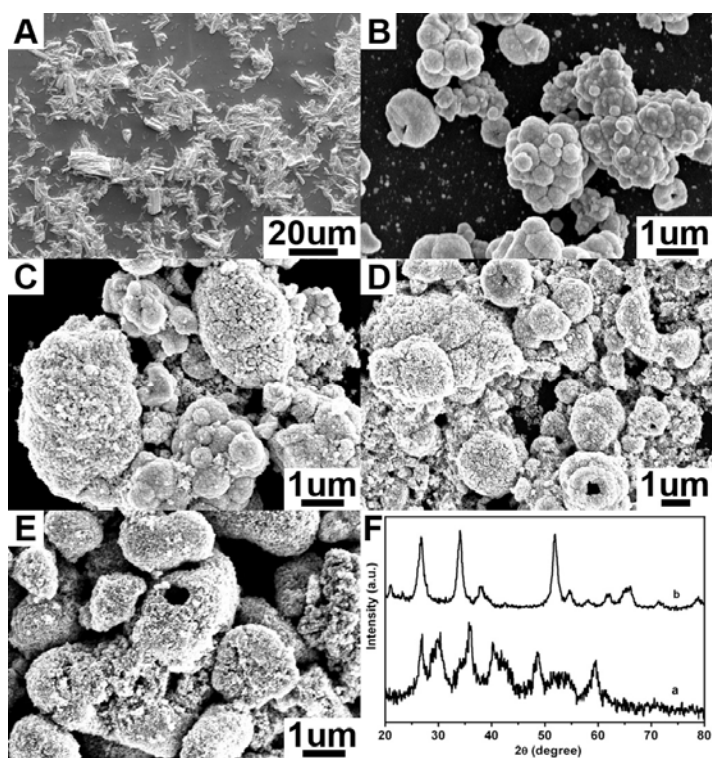

**Figure S3.** SEM images of the precursor (A) and SnO<sub>2</sub> self-assembly porous microspheres with different reaction time: (B) 3 h, (C) 6 h, (D) 9 h, (E) 12 h. (F) are the XRD spectra of the precursor and SnO<sub>2</sub> self-assembly porous microspheres with 3 h hydrothermal reaction.

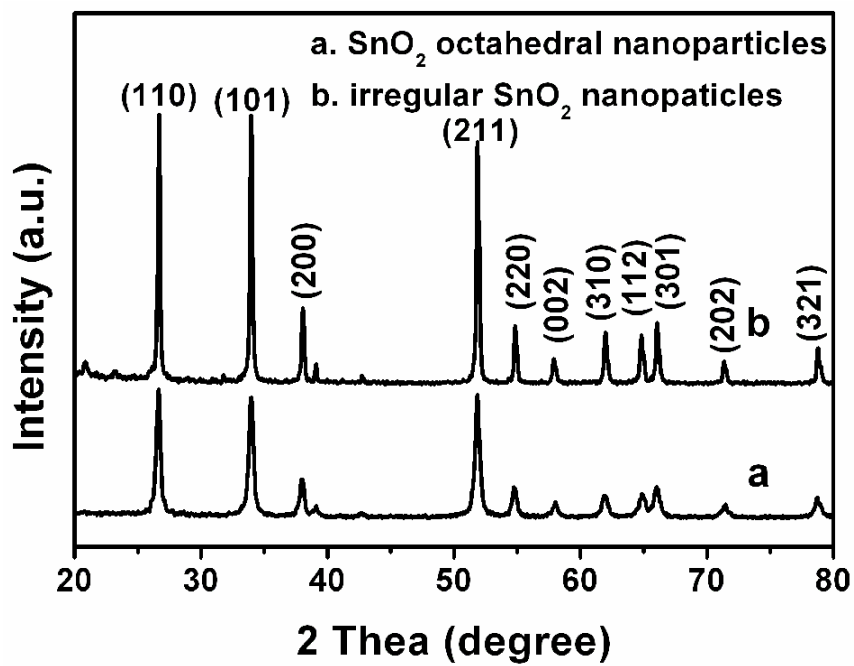

**Figure S4.** XRD patterns of SnO<sub>2</sub> octahedral nanoparticles (a) and irregular SnO<sub>2</sub> nanoparticles (b).

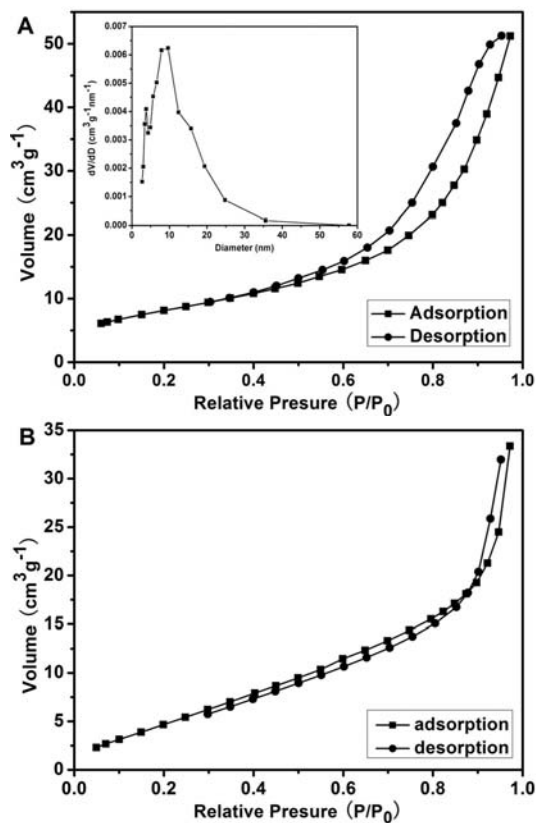

**Figure S5.** Adsorption-desorption isotherms of non-assembly SnO<sub>2</sub> octahedral nanoparticles (A) and irregular SnO<sub>2</sub> nanoparticles (B). In inset in (A) is the corresponding pore size distribution of non-assembly SnO<sub>2</sub> octahedral nanoparticles.
